# Supplementary material
Source: Springer Nature journal article supplement (https://www.springermedizin.de/resource/supplementary/12963_2013_235_MOESM6_ESM.pdf/9572444)

1996

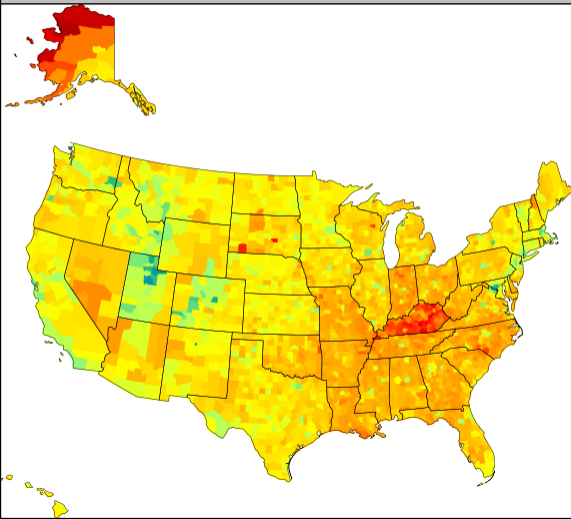

2012

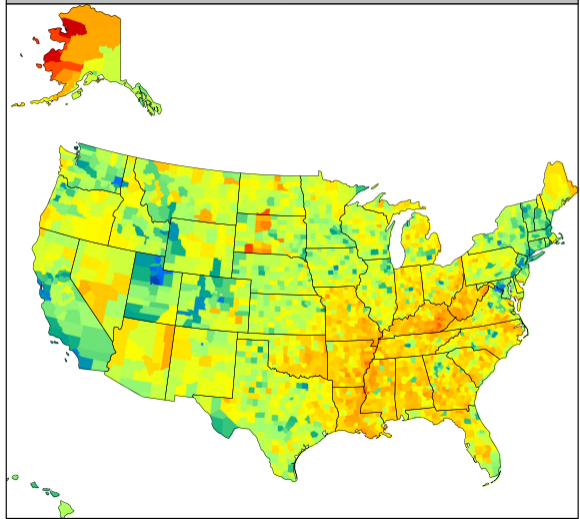

40%

35%

30%

25%

20%

15%

10%

Supplement: MOESM6 [file 9572444]
